# Supplementary material for: 3D Reconstruction of HvRNASET2 Molecule to Understand Its Antibacterial Role
Source: MDPI journal article supplement (doi:10.3390/ijms21249722), 2020-12-19
Supplement: s1 [file s1]

**A**

Human RNASET2  
HvRNASET2

**B**

Local Quality Estimate

Predicted Local Similarity to Target

Residue Number

HvRNASET2 QMEANDisCo

**C**

**D**

**E**

**F**

| Protein     | Sequence                                                                                               | Position |
|-------------|--------------------------------------------------------------------------------------------------------|----------|
| Actbind     | 1 -MSFLPSVGMALGAMQLS--SGAL----ATIDTCSSDSPLSQOTDNEASCCFNPSGGSLLOTQFQVDY-----PS--DGPSGSSNTIHLVFNQNC      | 81       |
| Human       | 1 -MRPAALRG-ALLGCLCLAL--L-----CLGGADKRLRD-----NHGWKLIIMVQHAPETVCEKIQN-----DCRDP--PDYNTIHLVFPKKS        | 72       |
| T.curvispic | 1 ----MRK-YSI-ASCI-VLLYL-LTHGIYFNTREYRKQT-----SNEFDVLI FTQQAPLTACFWKNKSDTRSCSLPR-HDENTIHLVIMPTKY       | 81       |
| Hydra       | 1 MFAFQQLTI-FVLI-AMLMRMFEGLPVPVNIHQETSNPKVNI-----AVEVDYFMLVTEWPGSSCYVYVATHQHHTTCYIPDAVIGNTIHLVLPVSE    | 88       |
| Hirudo      | 1 -----MLL-SVCFVLLASY-----CTARPLK-----BELVDHFVFTQWPOSIQNELDY-TEEEECMLPEKTIHMLHGLWPSYQ                  | 68       |
| C.gigas     | 1 -----MLALLLIQL-----CATYSAY-----SDMDIFTYQWNPVAVCIKGG-----EEHTCTIPFGVQGLIHLWVTKT                       | 63       |
| Actbind     | 82 DGTGYCEYCDSESYNSITSILEAQNRTELLSYMKWVDPVEGA-DEDESPWEHGWKHTGQINTIEPSCTDYIAQEEVGDFQGVVLDKFTLDSYALSDA   | 182      |
| Human       | 73 EG-----CNRSWPF-----NLEEIKDILPEMRAWPDVISHFPNRSFVWKHWEKHGTCAAGVDA-----LNSQKYFGRSLELYRELDNSVLLKL       | 154      |
| T.curvispic | 82 NTLGPOFOKSLVF-----NPSAIPISSELKEMALDIHKQ-SKPIFWKHEDKHOTDAVTYKA-----LWNEFPVFEASGLFDKYIMMDVLA          | 167      |
| Hydra       | 89 KGQOPFFCEPW-KF-----DEKVKDLEGNLELWPNIFVE-TTPQSPW-HSEYKHGTGASSVKG-----FETEDHYFQKALELREKFDIMRVLS       | 153      |
| Hirudo      | 69 NTRGNPFCTKD-KF-----NESLISPLEDOLIIMPNLKPNI-TGKYSPWKHGWKHTGCLSMDE-----LDSELKYFKVLELHKTDFVMKGLKEA      | 173      |
| C.gigas     | 64 GTEGPTSCGTG-PF-----HADAITPILPHLIKIMPNMYAD-TSVYSPWEHGWKHTGCLASSLNA-----TSTERYFSKALDLYARFNGQITLANQ    | 148      |
| Actbind     | 183 G1TPSEDAITYKLSIDEDALAAIHGVPYVYVCGEDG-----ALSQLYYYFNIVKGSAG1GGTYVASERLEDNSCKDSG1KYPPIKYSKKI1YGGSL   | 270      |
| Human       | 155 G1KPSIN-YYQADFQKDALARYGV1PK1I-QCLPPSQDEEVQTIQIIECLCTKQDQOLQNTCEP-----GEQ-----PSPKQE--WLANGAAES     | 235      |
| T.curvispic | 168 N1LPGNK--YMWQMLKG1QK1LNTRGQ1-MCVTDK-THESYVIEMLRCFDKTLQVNCDG1Y--HFPTNCRSKELIYPSHVPH--YYVTQT         | 252      |
| Hydra       | 174 K1VPSTSSYQFSDIEALKSOYSKACVF-ECSQIK--HSQQVLSAGYVCLNKOLEQIDCGYCE-----HGCKTDEPIFYHKS--NLYESVVA        | 258      |
| Hirudo      | 154 GFGPSDKDSYQEDLDALESV1GVKGM1-MCYNPRN-EPLQYLAQIEFLCKDSFQPMCPCHPS-----YEASLENPDQSLHRS1--DFESTVLESKERN | 244      |
| C.gigas     | 149 G1VPSQTATYDIKTSEALKKELGVNALI-QCTYDHN-TSRQV1YE1E1CLSKNIFPVDCYFDE-----GNTSGKRSHH--HH--KYSS           | 226      |
| Actbind     | 236 -----RGLRVCEGDPVYFPPPKTKH-----                                                                     | 256      |
| Human       | 245 LHKVLMKRIHNKNTNTFTGORSQGEFKMRELRI1ICSDKKEIMYP1IDHWQMIQHSNS                                         | 304      |
| Hydra       | 227 -----HPHSSCPESYGFYPP1IDGVYSNP1-----                                                                | 251      |

**Figure S1.** (A) Three-dimensional alignment of human RNASET2 (in cyan) and *H. verbana* HvRNASET2 (in orange). The secondary structures ( $\beta$ -strands and  $\alpha$ -helix) appear extremely conserved. (B) Graphical representation of the HvRNASET2 QMEANDisCo score. The plot shows the precise QMean value of every amino acid. (C-E) Alternative three-dimensional models of HvRNASET2 obtained with the following servers for 3D structures prediction: Phyre2 (C), Robetta-Baker Lab (D) and RaptorX Contact Predict (E). Of note, the antimicrobial peptide (QVLKMRIHNKNNNTNTFT), represented in orange, is specifically localized on the external surface of the enzyme. (F) Multiple sequence alignments. The HvRNASET2 amino acid sequence has been

compared with all the sequences considered in the Figure 1. The complete alignment confirms that the conserved active sites (CAS I and CAS II) are extremely preserved. Different blue shades identify the diverse conservation of each amino acid.
